# Supplementary material
Source: PubMed Central journal article supplement (PMC4146459)
Supplement: NIHMS587972-supplement-1.pdf [file NIHMS587972-supplement-1.pdf]

# Supplementary Figure 1

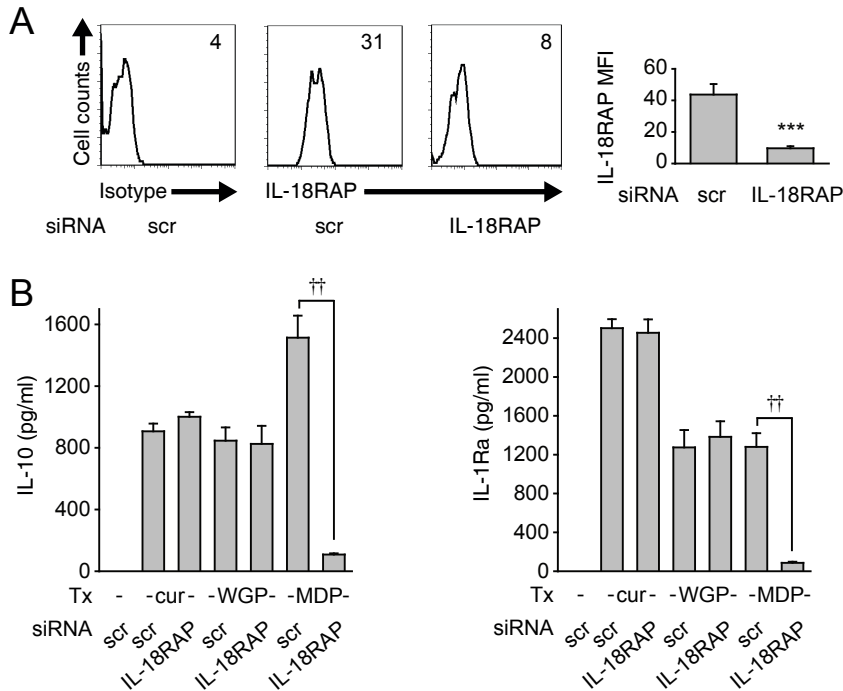

## Supplementary Figure 1. MDM knocked-down for IL-18RAP can respond to other stimuli.

(A) Human MDM (n=4) were transfected with scrambled or IL-18RAP siRNA for 48h. (Left): Representative flow cytometry plot of IL-18RAP expression from one of four individuals. (Right) Summarized data (n=4) are represented as IL-18RAP surface expression by MFI.

(B) Human MDM were transfected with scrambled or IL-18RAP siRNA for 48h, then stimulated with 100 µg/ml curdlan (cur) or 100 µg/ml dispersible whole glucan particles (WGP) (Invivogen, San Diego, CA) for 24h. IL-10 and IL-1Ra secretion (n=4). Treatment with 100 µg/ml MDP is shown as a positive control for IL-18RAP knock-down effects. Tx, treatment; scr, scrambled.

\*\*\*,  $p < 0.001$ ; ††,  $p < 1 \times 10^{-5}$ .

## Supplementary Figure 2

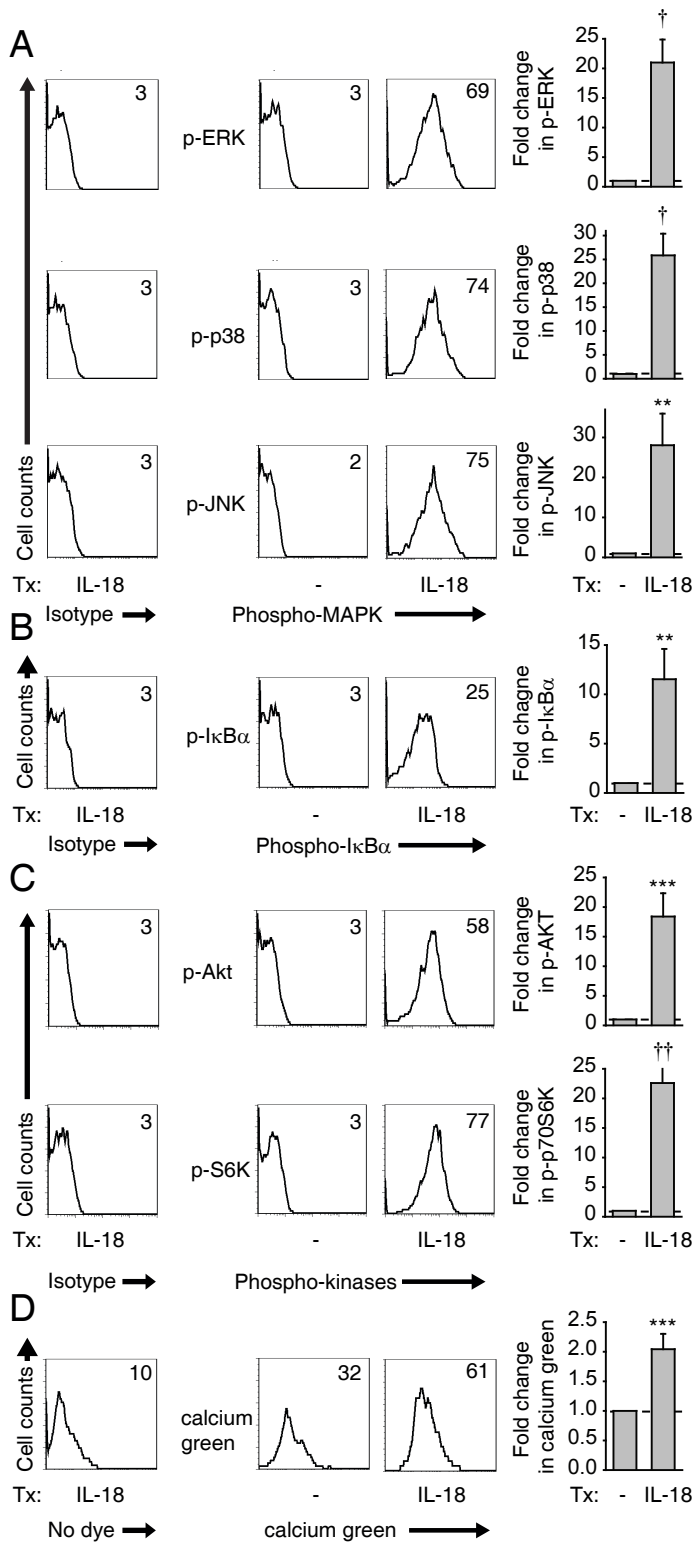

**Supplementary Figure 2. IL-18 activates MAPK, NF-κB, PI3K and induces calcium flux in primary human MDM.** Human MDM (n=8) were stimulated for 15 min with 10 ng/ml IL-18. *Left:* Representative flow cytometry plots with MFI values for (A) phospho-ERK, phospho-p38, phospho-JNK, (B) phospho-IκBα, (C) phospho-Akt and phospho-p70S6K or (D) calcium green. *Right:* Summarized data are represented as the fold phospho-protein or calcium flux induction normalized to untreated cells (represented by the dotted line at 1) + SEM. Tx, treatment. \*\*, p<0.01; \*\*\*, p<0.001; †, p<1x10<sup>-4</sup>; ††, p<1x10<sup>-5</sup>.

# Supplementary Figure 3

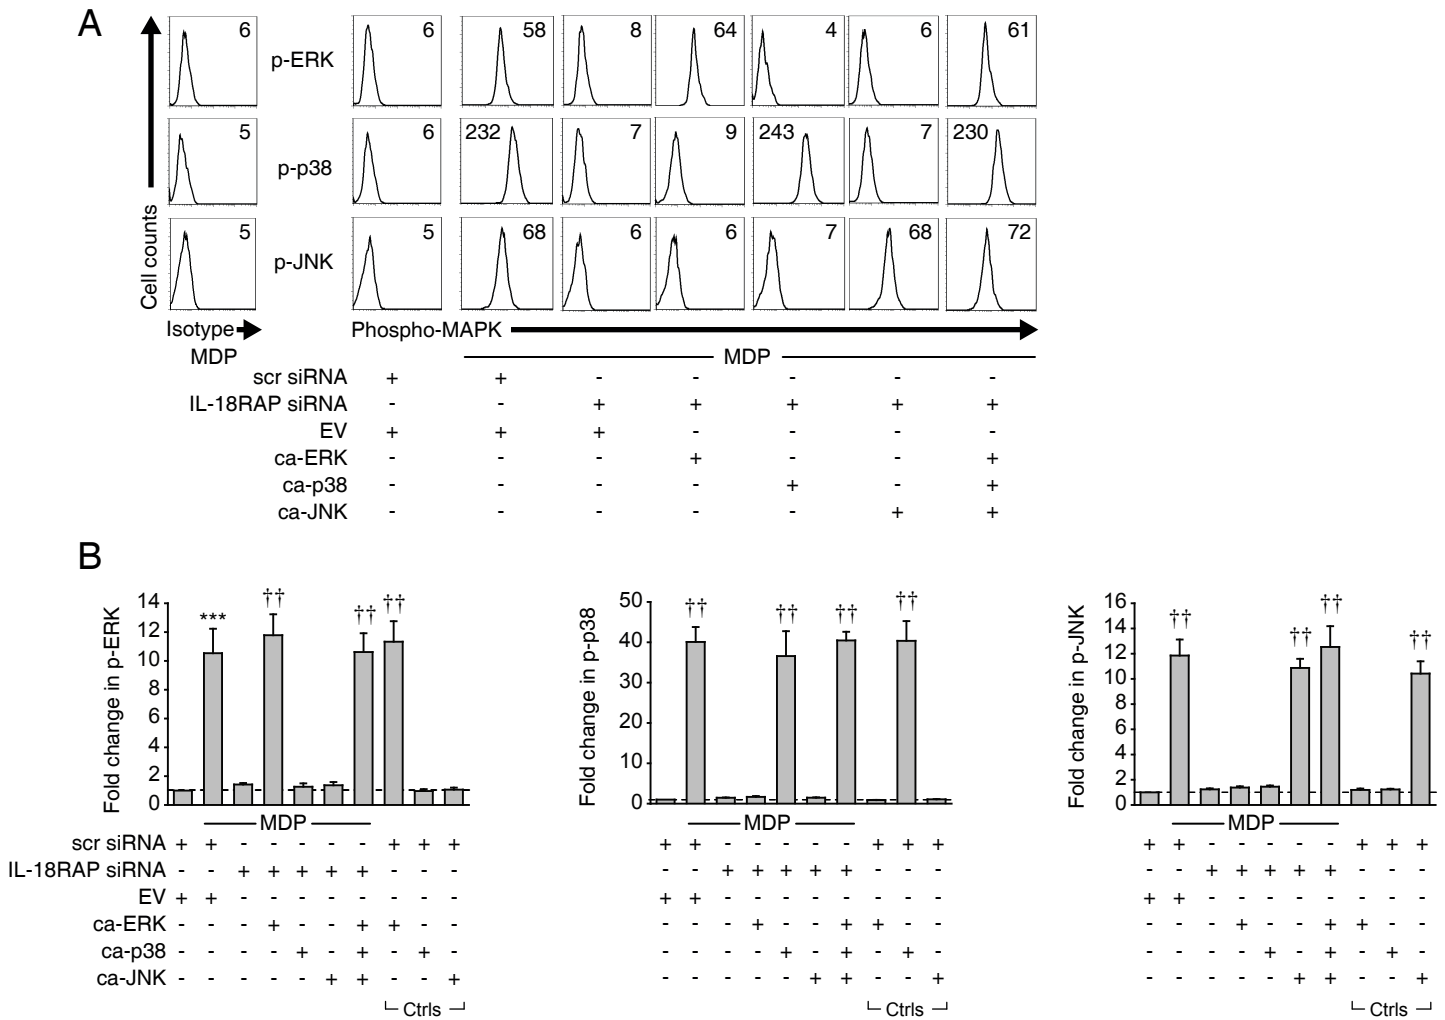

**Supplementary Figure 3. MAPK activation rescues the decreased cytokine secretion following NOD2 stimulation in the absence of IL-18RAP signaling in MDM.** (A,B) MDM (n=7) were transfected with scrambled or IL-18RAP siRNA and/or 5  $\mu$ g pMCL-MKK1 (R4F) (leading to constitutively active ERK kinase, ca-ERK), pCDNA3-Flag MKK6(glu) (leading to constitutively active p38 kinase, ca-p38), pSR $\alpha$ -3HA-JNKK2-JNK1 WT (leading to constitutively active JNK, ca-JNK), the three vectors in combination, or empty vector (EV) and left untreated (controls) or 48h later stimulated with 100  $\mu$ g/ml MDP for 15 min and analyzed by flow cytometry for phospho-kinase induction. (A) Representative histograms with indicated MFI and isotype controls. (B) Data are represented as the fold MAPK activation normalized to EV and scrambled siRNA transfected cells (represented by the dotted line at 1) + SEM. Significance is shown relative to untreated, EV, scrambled siRNA transfected cells. \*\*\*,  $p < 0.001$ ; ††,  $p < 1 \times 10^{-5}$ . Tx, treatment; p-, phospho-; ctrls, controls.

# Supplementary Figure 4

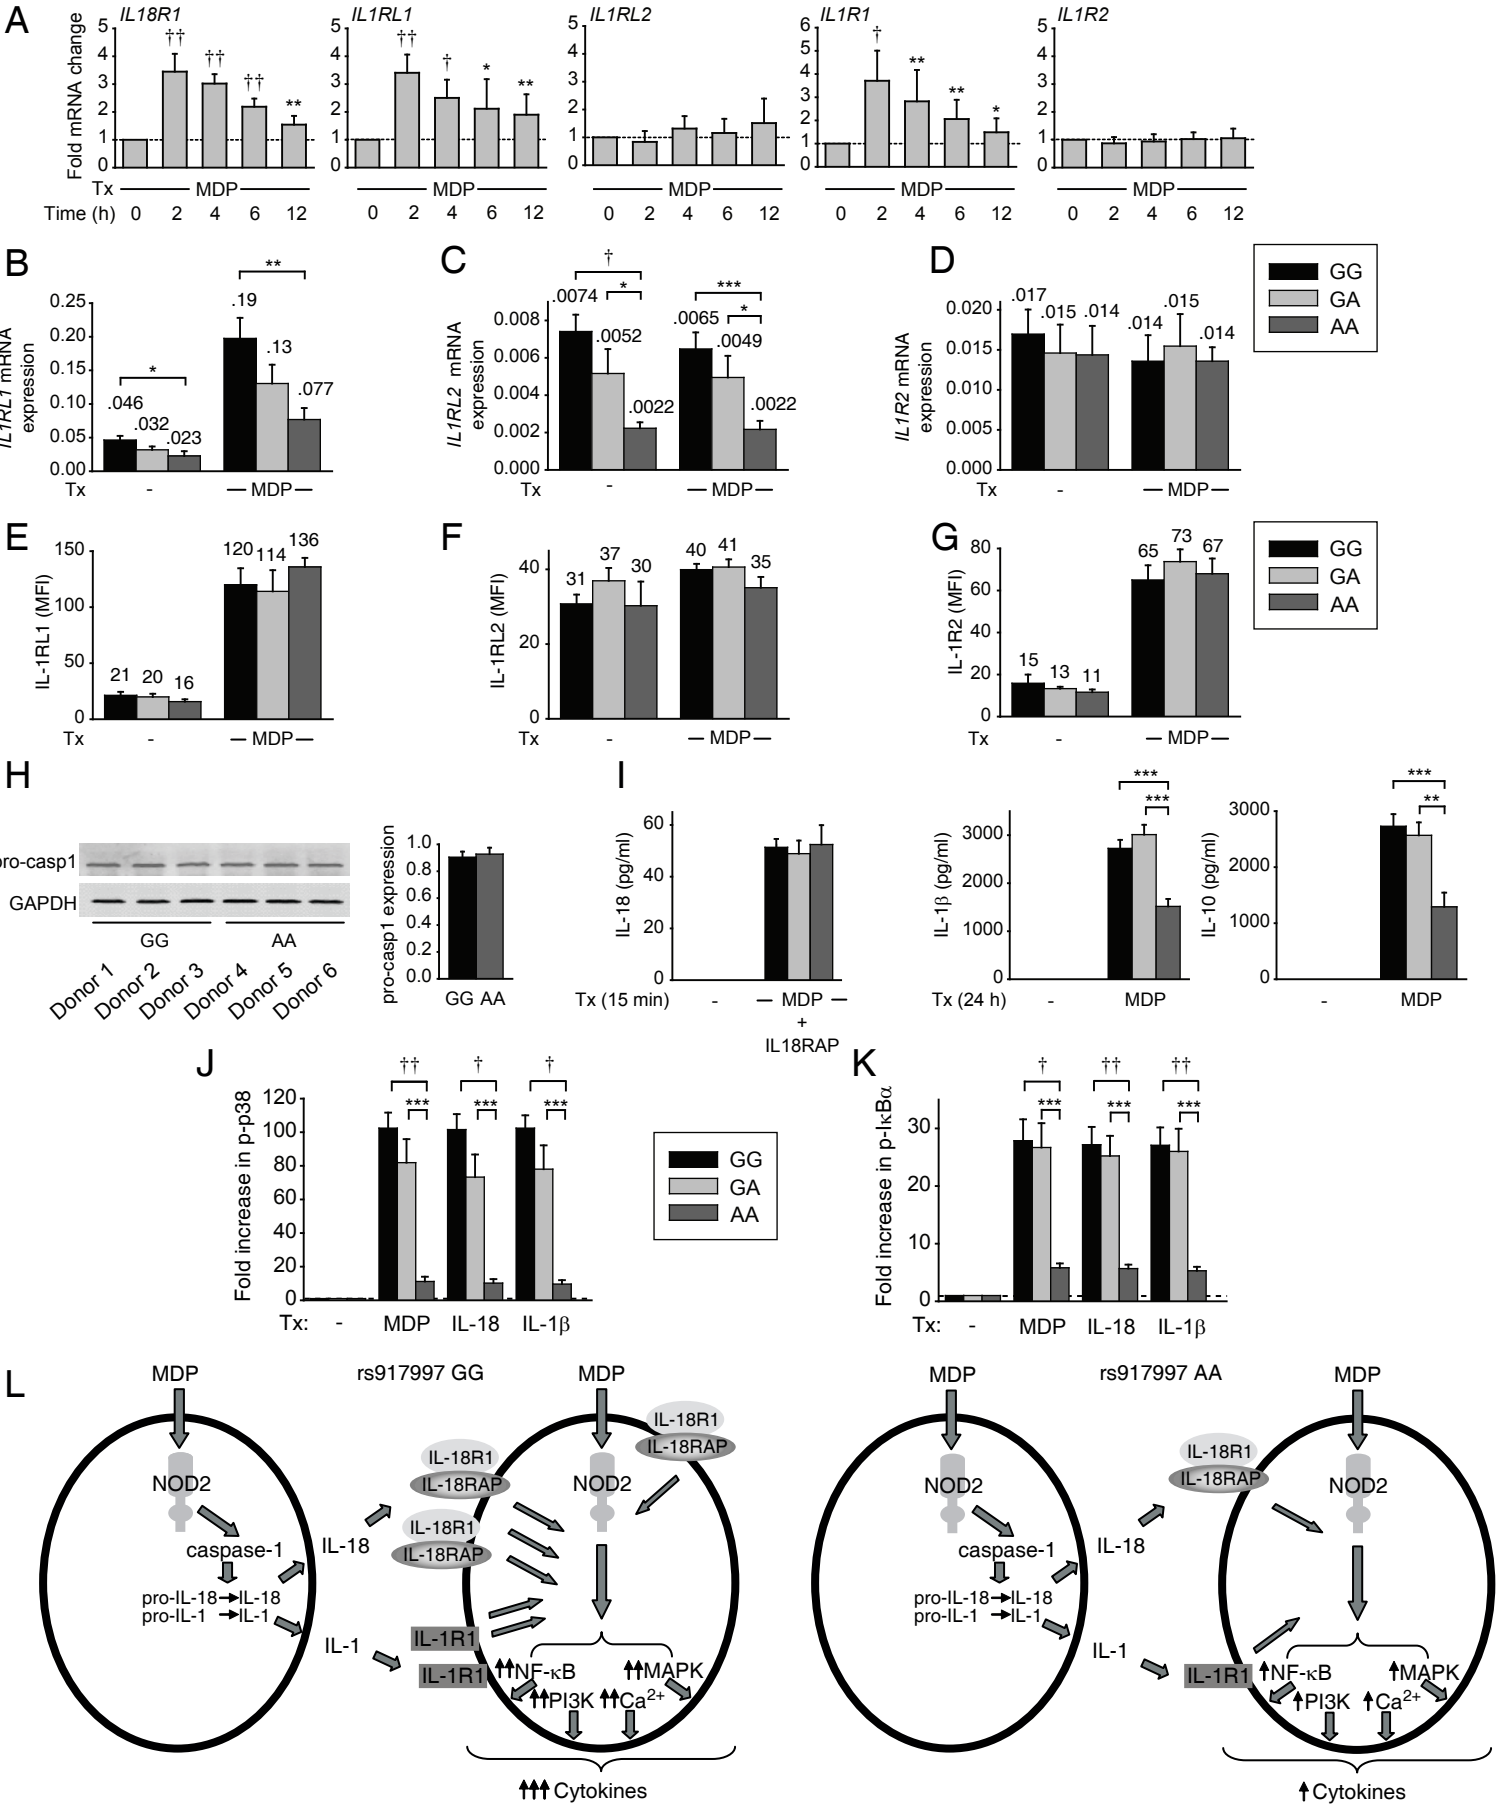

**Supplementary Figure 4. NOD2 stimulation induces IL-18R1, IL-1RL1, IL-1RL2, IL-1R1 and IL-1R2 expression and MDM from rs917997 AA risk carriers show decreased NOD2-, IL-18- and IL-1-mediated p38 and NF- $\kappa$ B activation relative to GA and GG carriers. (A)** MDM (n=8) were stimulated for the indicated time points with 100  $\mu$ g/ml MDP. Summarized data are represented as the fold *IL18R1*, *IL1RL1*, *IL1RL2*, *IL1R1* and *IL1R2* induction normalized to untreated cells (represented by the dotted line at 1) + SEM. **(B-G)** MDM from rs917997 GG, GA or AA carriers were left untreated or stimulated with 100  $\mu$ g/ml MDP for **(B,C,D)** 2h or **(E,F,G)** 6h. *IL1RL1* **(B)**, *IL1RL2* **(C)** or *IL1R2* **(D)** mRNA expression (change in CT values normalized to GAPDH and represented as a linear scale). IL-1RL1 **(E)**, IL-1R2 **(F)** or IL-1R2 **(G)** surface protein expression (R&D Systems), with average MFI values above bars. For **(B,C,E,D,G)** rs917997 GG, GA or AA carriers from n=16, n=15 and n=9, respectively. For **(F)** rs917997 GG, GA or AA carriers n=10, n=10 and n=6, respectively. **(H)** Pro-caspase-1 expression by Western blot from 3 representative rs917997 GG and AA donors. Summarized data (rs917997 GG [n=10] and AA [n=6] carrier MDM, respectively) are represented as the relative expression of pro-caspase-1 normalized to GAPDH+SEM. **(I)** MDM from rs917997 GG or AA carriers (n=10 and n=6, respectively) were (*left*) left untreated or incubated with anti-IL-18RAP (300 ng/ml) blocking antibody for 1h to prevent IL-18 consumption, and then stimulated with 100  $\mu$ g/ml MDP for 15 min to assess early IL-18 secretion, or (*right*) treated with 100  $\mu$ g/ml MDP for 24h to confirm genotype-dependent regulation of long-term cytokine secretion as a control. Supernatants were assessed for indicated cytokines. **(J,K)** MDM from rs917997 GG, GA or AA carriers (n=10, n=9 and n=8, respectively) were stimulated for 15 min with 100  $\mu$ g/ml MDP, 10 ng/ml IL-18 or 10 ng/ml IL-1 $\beta$ . Summarized data are represented as the fold phosphokinase induction normalized to untreated cells + SEM. \*, p<0.05; \*\*, p<0.01; \*\*\*, p<0.001; †, p<1x10<sup>-4</sup>; ††, p<1x10<sup>-5</sup>. **(L)** A model for the role rs917997 in autocrine IL-18 and IL-1 signaling pathways and cytokine induction upon NOD2 stimulation. MDP stimulation of NOD2 in MDM rapidly induces caspase-1 activation which cleaves pre-existing pro-IL-18 stores to result in early IL-18 secretion (within 15 min). This autocrine IL-18 secretion stimulates IL-18RAP which results in enhanced MAPK, NF- $\kappa$ B, and PI3K signaling and an increased calcium flux. Similar amplification of MDP-mediated signaling by autocrine IL-1 occurs. The increased signaling associated with autocrine IL-18 and IL-1, in turn, results in a dramatic increase in cytokine secretion. Rs917997 AA carriers have decreased IL-18RAP, IL-18R1 and IL-1R1 expression on MDM, decreased IL-18- and IL-1-induced signaling and decreased PRR-induced cytokine secretion.
